# Supplementary material for: Multifunctional Nucleus-targeting Nanoparticles with Ultra-high Gene Transfection Efficiency for In Vivo Gene Therapy
Source: PubMed Central journal article supplement — Theranostics. 2017 Apr 10;7(6):1633–49. doi: 10.7150/thno.17588 (PMC5436517; doi:10.7150/thno.17588), 2017-04-10
Supplement: thnov07p1633s1.pdf [file thnov07p1633s1.pdf]

## Supplementary Materials

### **Multifunctional Nucleus-targeting Nanoparticles with Ultra-high Gene Transfection Efficiency for *In Vivo* Gene Therapy**

Ling Li <sup>a</sup>, Xia Li <sup>a</sup>, Yuzhe Wu <sup>b</sup>, Linjiang Song <sup>a</sup>, Xi Yang <sup>a</sup>, Tao He <sup>a</sup>, Ning Wang <sup>a</sup>,  
Suleixin Yang <sup>a</sup>, Yan Zeng <sup>a</sup>, Qinjie Wu <sup>a</sup>, Zhiyong Qian <sup>a</sup>, Yuquan Wei <sup>a</sup>, Changyang  
Gong <sup>a,\*</sup>

<sup>a</sup> State Key Laboratory of Biotherapy and Cancer Center, West China Hospital, Sichuan University, and Collaborative Innovation Center for Biotherapy, Chengdu, 610041, P. R. China

<sup>b</sup> College of Materials, Xiamen University, Xiamen 361005, P.R. China

\* To whom correspondence should be addressed (C Gong). E-mail: [chyong14@163.com](mailto:chyong14@163.com) or [gongchangyang@scu.edu.cn](mailto:gongchangyang@scu.edu.cn).

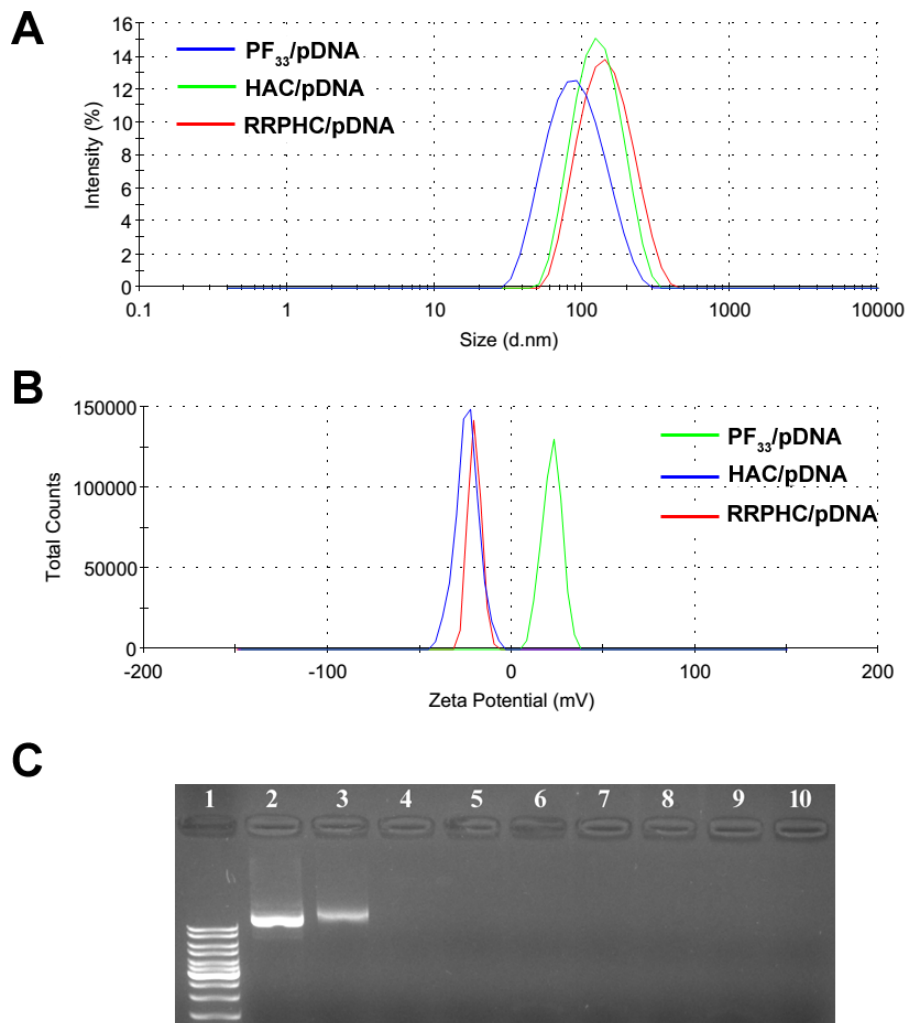

**Fig. S1.** (A, B) Particle size and zeta potential of the binary and ternary complexes measured by DLS. (C) Agarose gel electrophoresis of PF<sub>33</sub>/pDNA complexes, HAC/pDNA complexes and RRPHC/pDNA complexes. Lane 1, DNA ladder; lane 2, naked pDNA; lane 3-8, PF<sub>33</sub>/pDNA at mass ratios of 0.5:1, 1:1, 2:1, 4:1, 8:1, 10:1; lane 9, HAC/pDNA; lane 10, RRPHC/pDNA.

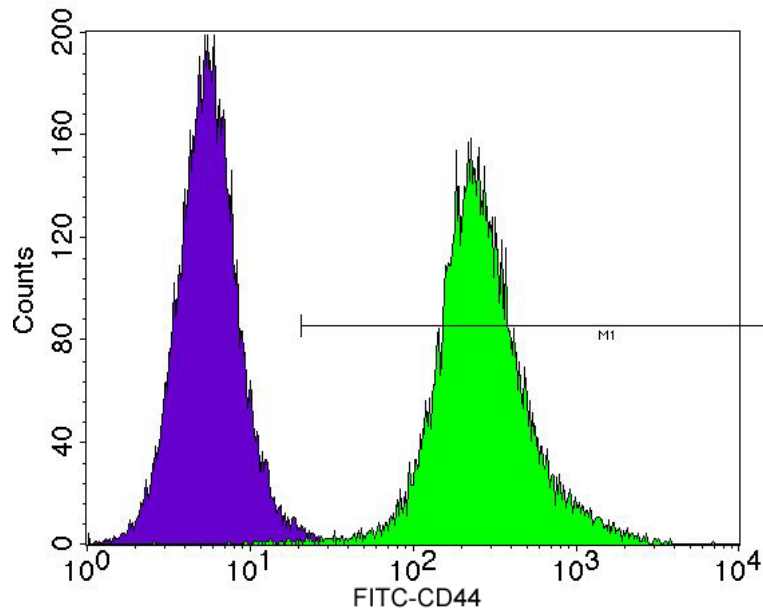

**Fig. S2.** Determination the expression level of CD44 receptor on the surface of HCT 116 cells by flow cytometry. Isotype control (purple).

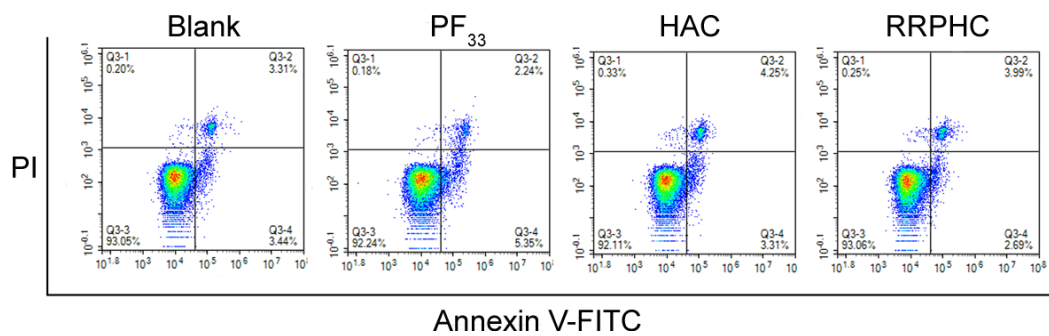

**Fig. S3.** *In vitro* apoptosis-inducing effect in HCT 116 cells after treatment with PF<sub>33</sub>, RRPH, HA and RRPH materials at 24 h. \* $p < 0.05$ , \*\* $p < 0.01$  and \*\*\* $p < 0.001$ .

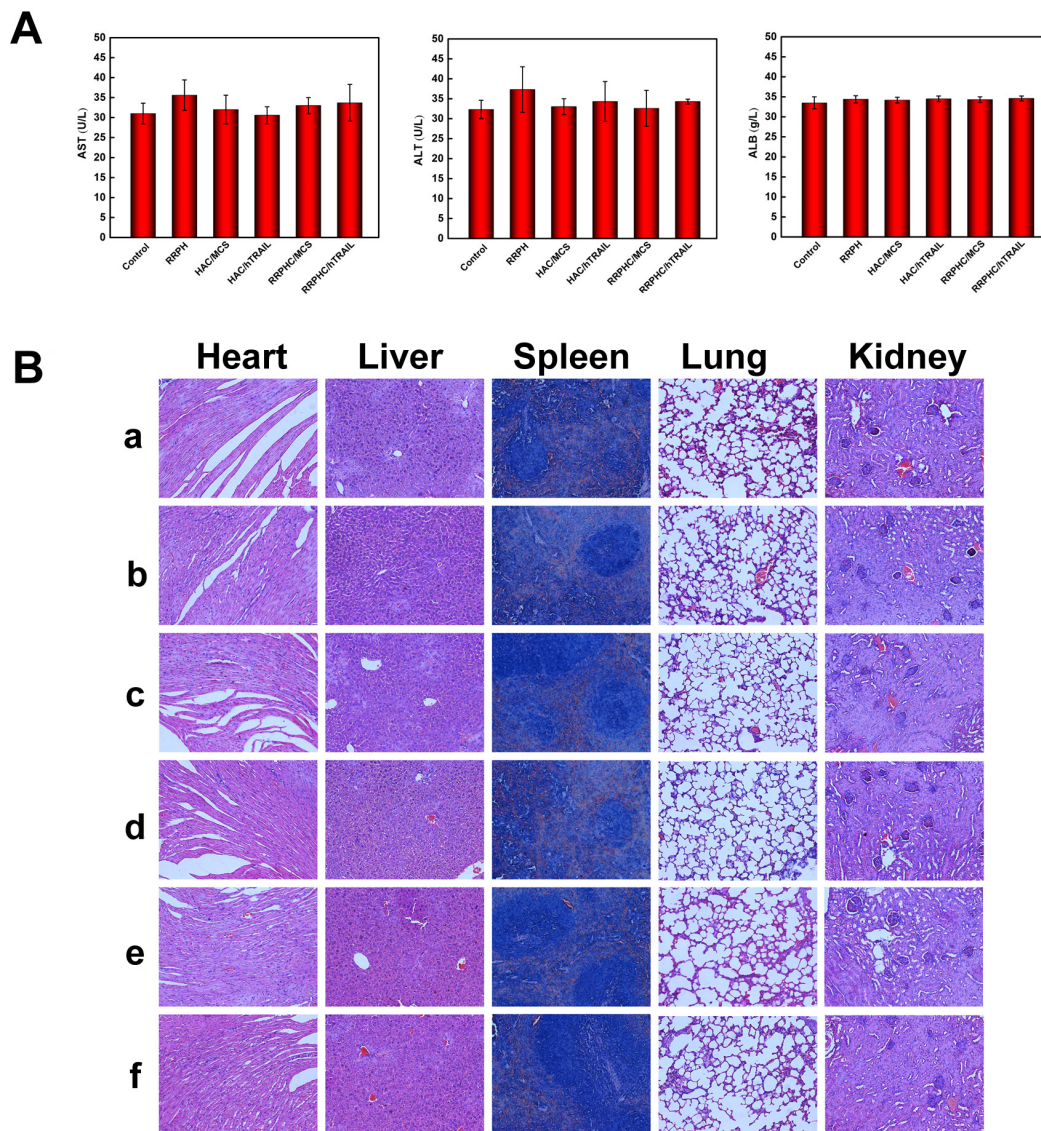

**Fig. S4.** Safety and toxicity evaluation. (A) Serum AST, ALT and ALB levels of mice after treatment with different formulations. (B) Histological examination of H&E staining of vital organ sections. PBS (a), RRPH (b), HAC/MCS (c), HAC/hTRAIL (d), RRPHC/MCS (e) and RRPHC/hTRAIL (f).

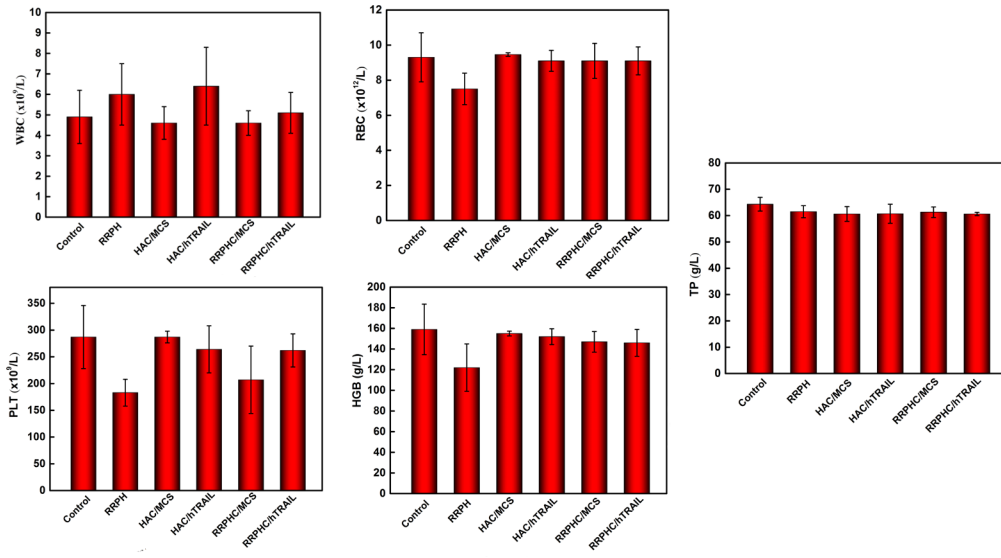

**Fig. S5.** Complete blood count (CBC) test after treatment with different formulations.
